# Supplementary material for: Novel K2Ti8O17 Anode via Na+/Al3+ Co-Intercalation Mechanism for Rechargeable Aqueous Al-Ion Battery with Superior Rate Capability
Source: MDPI journal article supplement (doi:10.3390/nano11092332), 2021-09-08
Supplement: s1 [file s1]

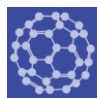

## Article

# Novel $\text{K}_2\text{Ti}_8\text{O}_{17}$ Anode via $\text{Na}^+/\text{Al}^{3+}$ Co-Intercalation Mechanism for Rechargeable Aqueous Al-Ion Battery with Superior Rate Capability

Qiangqiang Feng <sup>1,†</sup>, Yanyan Liu <sup>1,\*,†</sup>, Jitong Yan <sup>1</sup>, Wei Feng <sup>1</sup>, Shaozheng Ji <sup>2,3</sup> and Yongfu Tang <sup>1,\*</sup>

<sup>1</sup> Hebei Key Laboratory of Applied Chemistry, College of Environmental and Chemical Engineering, Yanshan University, Qinhuangdao 066004, China; f2394713046@163.com (Q.F.); yanjitong@outlook.com (J.Y.); fw980240907@163.com (W.F.)

<sup>2</sup> Materials and Nano Physics, School of Engineering Sciences, KTH Royal Institute of Technology, SE-100 44 Stockholm, Sweden; jshaoz@kth.se

<sup>3</sup> School of Physics, Ultrafast Electron Microscopy Laboratory, Nankai University, Tianjin 300071, China

\* Correspondence: liuyy@ysu.edu.cn (Y.L.); tangyongfu@ysu.edu.cn (Y.T.)

† These authors make equal contributions.

## 1. Supplementary Figures

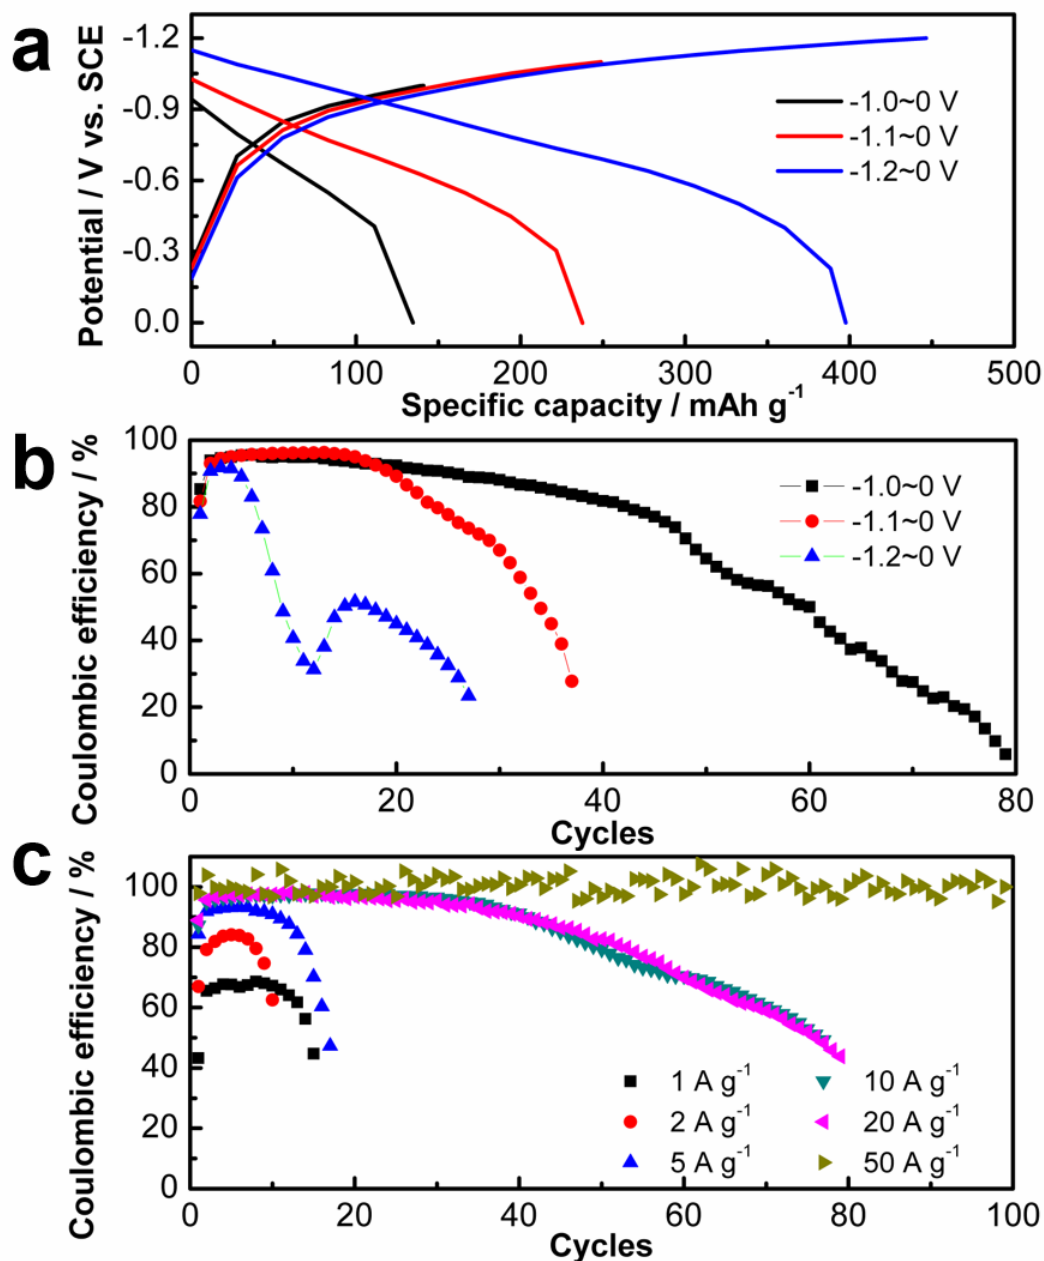

**Figure S1.** Electrochemical performance of  $K_2Ti_8O_{17}$  electrode in the 1 M  $AlCl_3$  aqueous solution. (a) GCD curves at different potential ranges with sweep rate of 10 mV s<sup>-1</sup>. (b) Coulombic efficiencies based on the GCD curves with a current density of 10 A g<sup>-1</sup> at different potential ranges. (c) Discharge efficiencies based on the GCD curves at different current densities with a potential range of -1~0 V<sub>vs</sub> SCE.

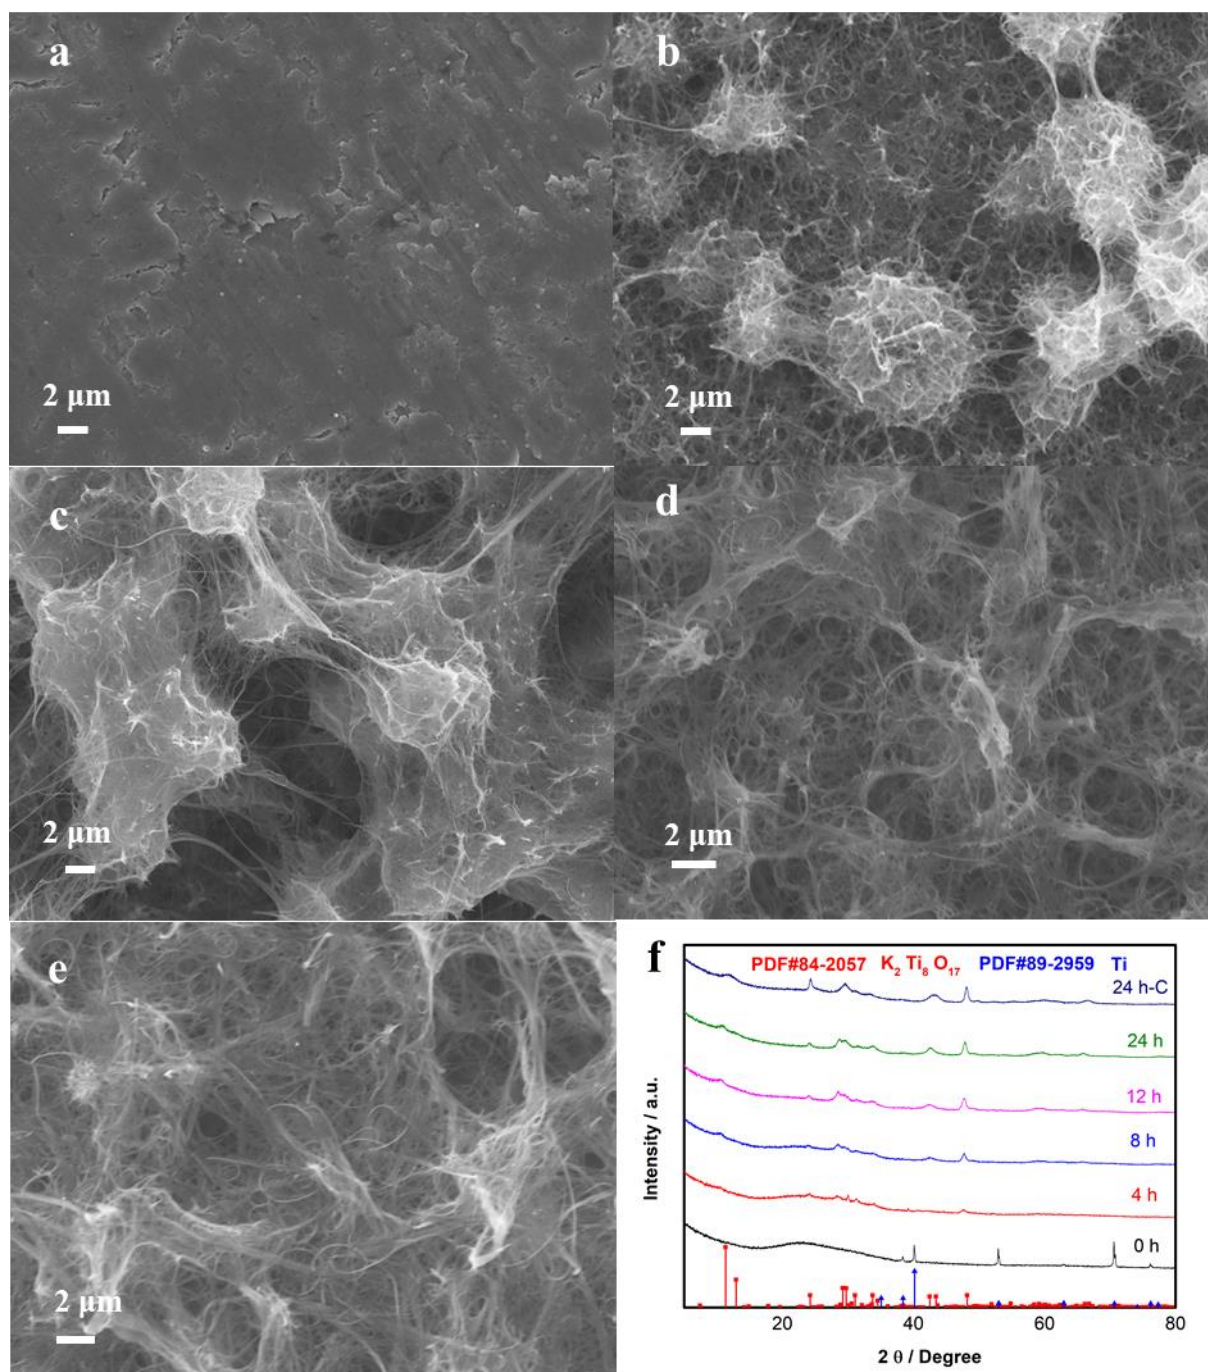

**Figure S2.** The morphology evolution process of  $K_2Ti_8O_{17}$  electrode with the hydrothermal reaction times: (a) 0 h, (b) 4 h, (c) 8 h, (d) 12 h, (e) 24 h, and (f) the XRD patterns of the  $K_2Ti_8O_{17}$  samples with different hydrothermal reaction times.

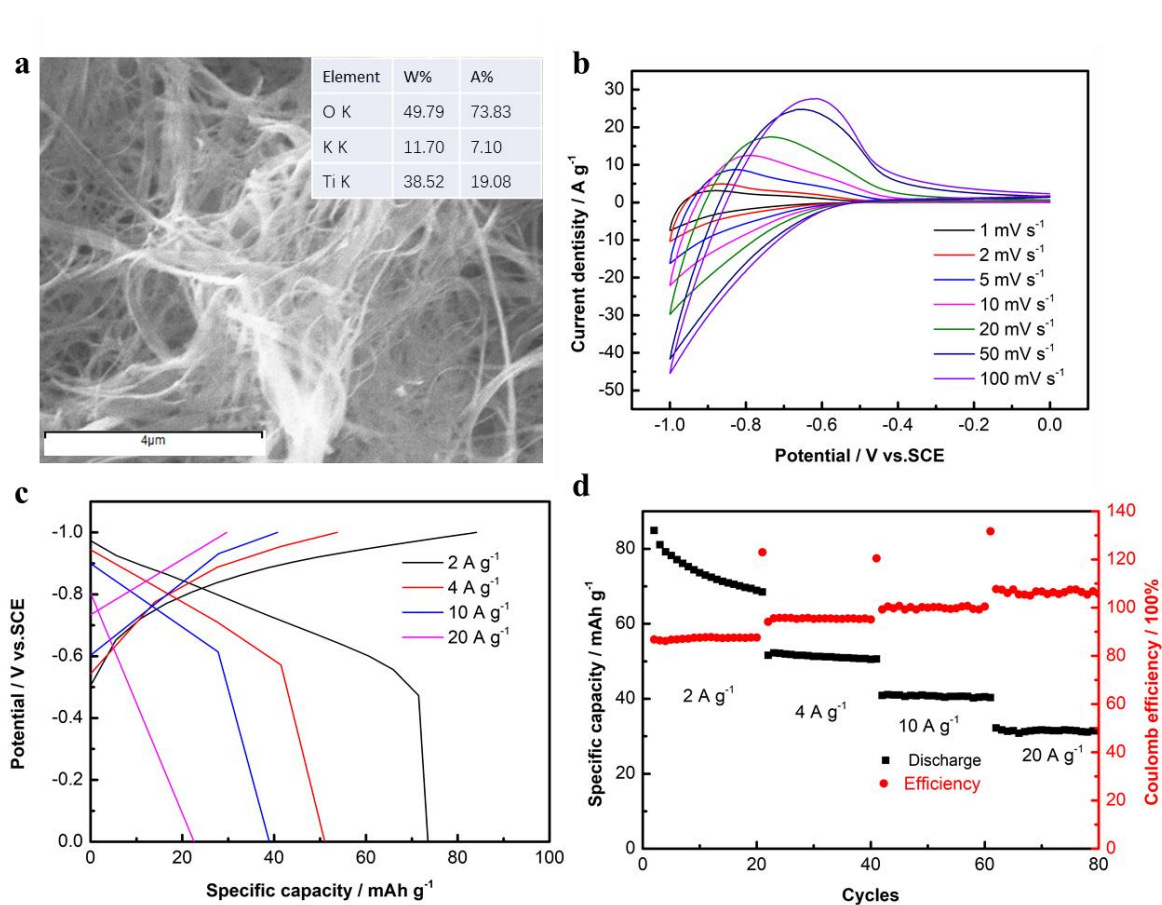

**Figure S3.** (a) The SEM and EDS results of the  $\text{K}_2\text{Ti}_8\text{O}_{17}$  sample suffering a 24 h hydrothermal process before pyrolysis step. The electrochemical measurements of  $\text{K}_2\text{Ti}_8\text{O}_{17}$  electrode in  $\text{AlCl}_3$  electrolyte: (b) CV curves at different scan rates, (c) GCD curves at different current densities, (d) rate performance.

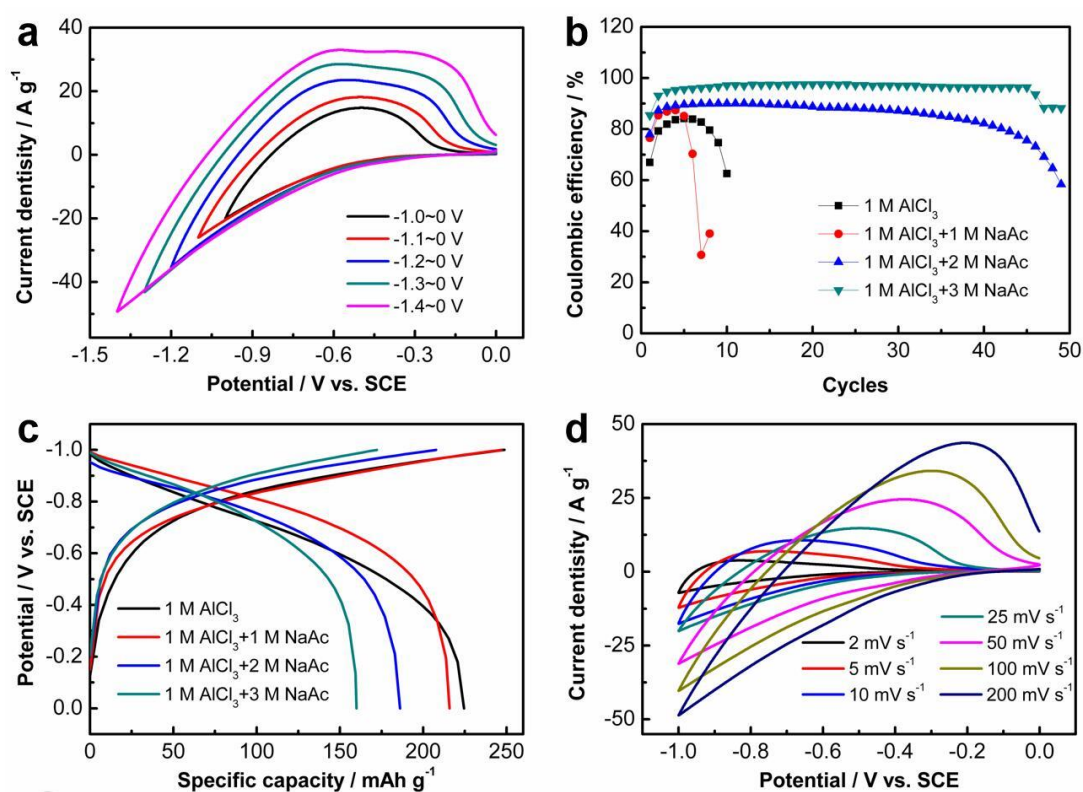

**Figure S4.** Electrochemical performance of  $K_2Ti_8O_{17}$  electrode in the  $AlCl_3/NaAc$  aqueous electrolyte. (a) CV curves at different potential ranges with scan rate of  $10 \text{ mV s}^{-1}$ . (b) CV curves with different scan rates at the potential range of -1 ~ 0 V vs SCE; Coulombic efficiencies based on the GCD curves with current density of  $10 \text{ A g}^{-1}$  at different potential ranges. (c) Coulombic efficiencies based on the GCD curves at different current densities with a potential range of -1~0 V vs SCE. (d) the CV curves at various scan rates.

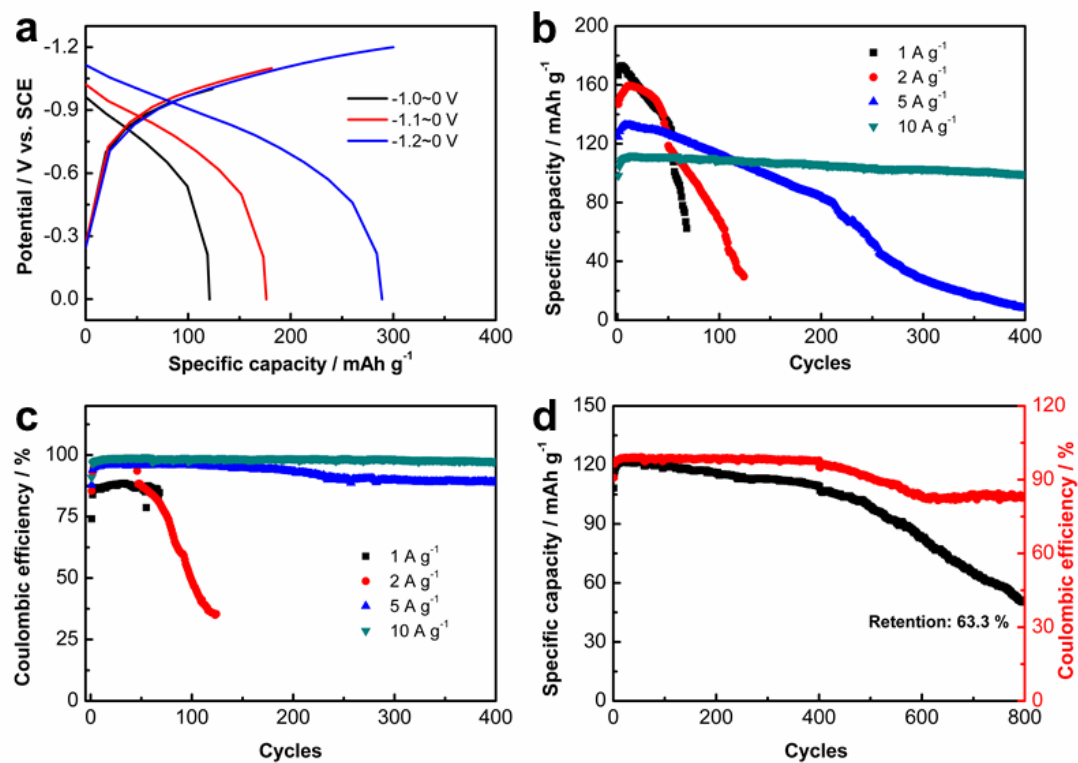

**Figure S5.** (a) Charge-discharge curves of  $K_2Ti_8O_{17}$  electrode at different potential ranges at the current density of  $10\text{ A g}^{-1}$ . (b) Cycling performances and (c) CEs of the  $K_2Ti_8O_{17}$  electrode at different current densities. (d) Cycling performance of  $K_2Ti_8O_{17}$  electrode at the current density of  $10\text{ A g}^{-1}$ .



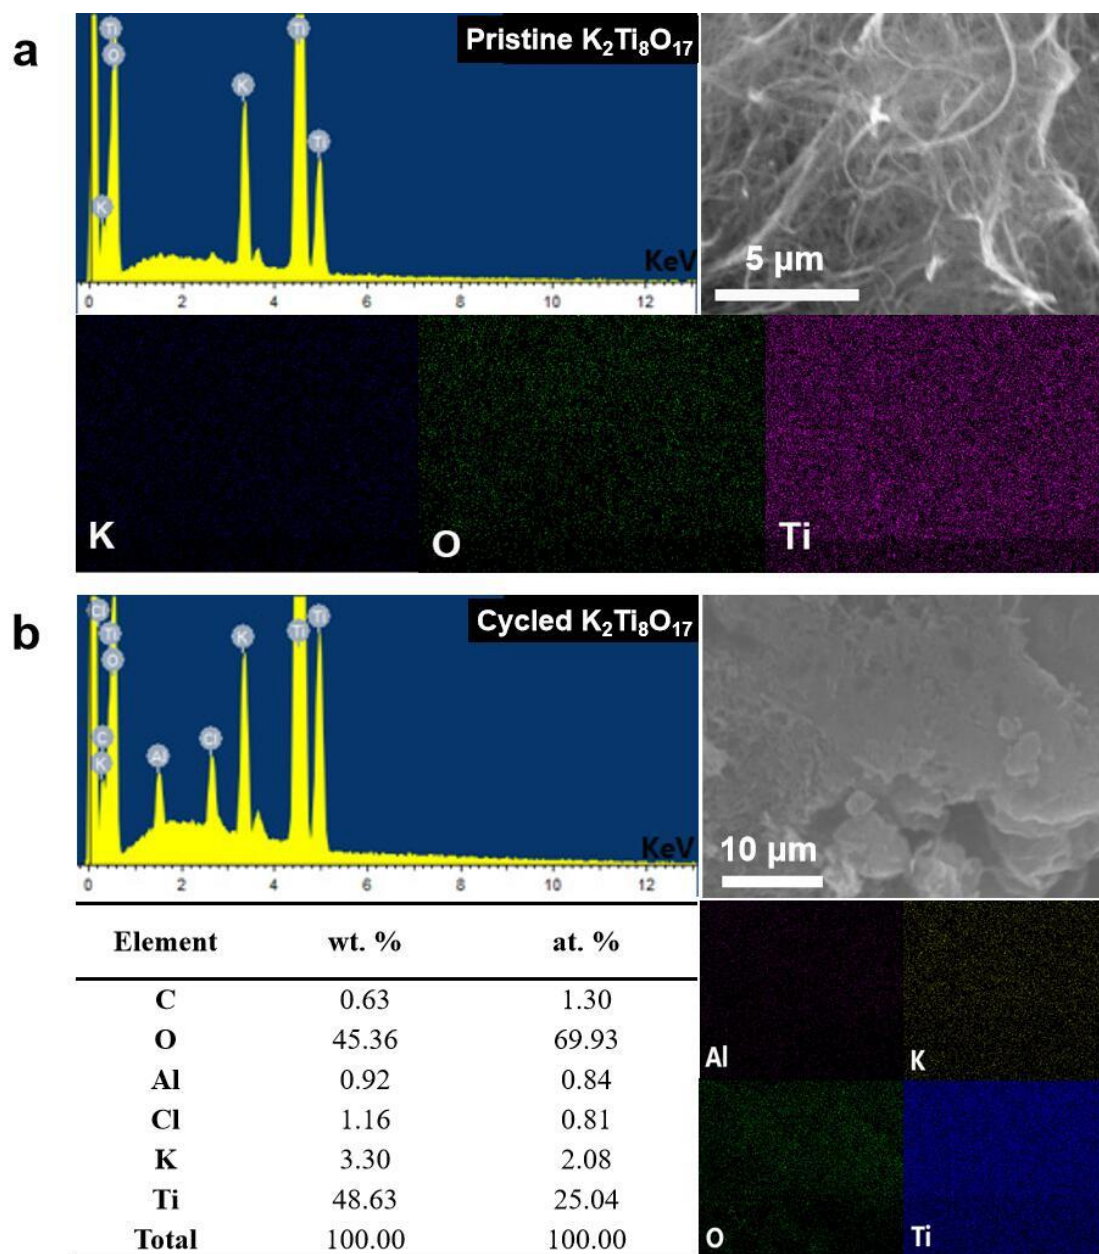

**Figure S6.** (a) EDX energy spectrum and element distribution of the pristine  $K_2Ti_8O_{17}$ . (b) EDX spectrum and element distribution diagram of electrode after 400 cycles of current density of  $10 A g^{-1}$  in  $AlCl_3/NaAc$  aqueous electrolyte.

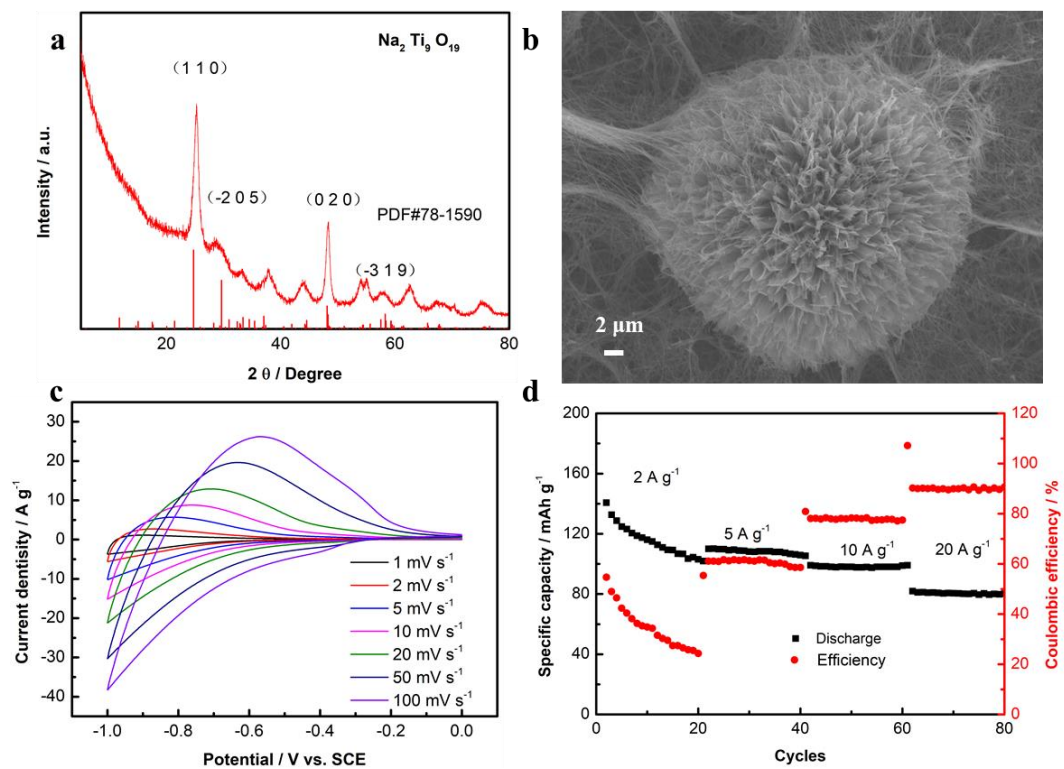

**Figure S7.** The physical characterizations and electrochemical performance of  $\text{Na}_2\text{Ti}_9\text{O}_{19}$  sample: (a) XRD pattern, (b) SEM image, (c) CV curves at different scan rates, and (d) rate capacity and CEs.



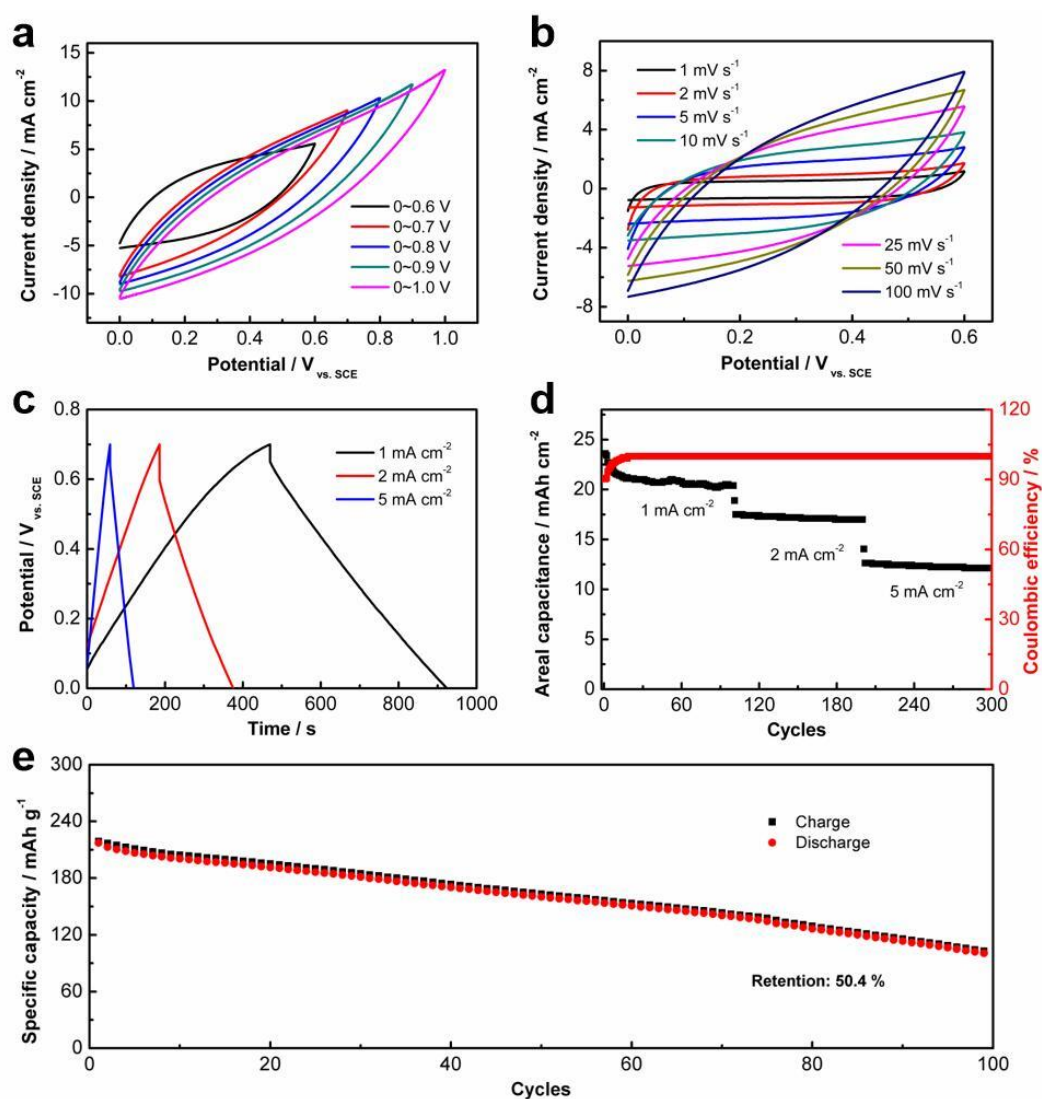

**Figure S8.** (a) CV curves of the AC coated on Ti mesh (AC-Ti) electrode at different potential ranges with Table 25. mV s<sup>-1</sup>. (b) CV curves of AC-Ti electrode with different scan rates at the potential range of 0~0.6 V. (c) GCD curves of the AC-Ti electrode at different current densities. (d) Rate-performance and (e) cycling stability of the AC-Ti electrode at different current densities at the potential range of 0~0.7 V.

## 2. Supplementary Table

**Table S1.** The ratio of the peak intensities of the  $e_g(L_3)/t_{2g}(L_3)$  in  $K_2Ti_8O_{17}$  electrode.

| Electrode              | $K_2Ti_8O_{17}$ | Discharge | Charge |
|------------------------|-----------------|-----------|--------|
| $e_g(L_3)/t_{2g}(L_3)$ | 3.3590          | 3.3149    | 3.4906 |
